# Supplementary material for: Coordinated head direction representations in mouse anterodorsal thalamic nucleus and retrosplenial cortex
Source: eLife. 2024 Mar 12;13:e82952. doi: 10.7554/eLife.82952 (PMC10932540; doi:10.7554/eLife.82952)
Supplement: Supplementary file 1. [file elife-82952-supp1.pdf]

**Table 1: Recording sessions summary**

| mouse   | Date     | Session Type  | ADn HD | ADn total | RSC HD | RSC total | ADn → RSC | RSC → ADn | Pairs total | Electrodes and advancement – fraction of turns |       |        |      |       |        |        |       |        |       | New ADn HD ensemble | New RSC HD ensemble | New ADn rotation ensemble | New RSC rotation ensemble | New ADn dark ensemble | New RSC dark ensemble |
|---------|----------|---------------|--------|-----------|--------|-----------|-----------|-----------|-------------|------------------------------------------------|-------|--------|------|-------|--------|--------|-------|--------|-------|---------------------|---------------------|---------------------------|---------------------------|-----------------------|-----------------------|
| mouse 1 | carbon   | fiber         |        |           | N/A    | N/A       | N/A       | N/A       | N/A         |                                                |       |        |      |       |        |        |       |        |       |                     |                     |                           |                           |                       |                       |
|         | 4/11/19  | on/off        | 14     | 19        |        |           |           |           |             |                                                |       |        |      |       |        |        |       |        |       |                     |                     |                           |                           | ✓                     |                       |
|         | 4/26/19  | on/off        | 15     | 23        |        |           |           |           |             |                                                |       |        |      |       |        |        |       |        |       |                     |                     |                           |                           |                       |                       |
|         | 4/30/19  | rotations+off | 11     | 18        |        |           |           |           |             |                                                |       |        |      |       |        |        |       |        |       |                     | ✓                   |                           |                           |                       |                       |
|         | 5/5/19   | rotations+off | 9      | 15        |        |           |           |           |             |                                                |       |        |      |       |        |        |       |        |       |                     |                     |                           |                           |                       |                       |
|         | 5/29/19  | on/off        | 8      | 31        |        |           |           |           |             |                                                |       |        |      |       |        |        |       |        |       |                     |                     |                           |                           |                       |                       |
|         | 6/9/19   | on/off        | 11     | 18        |        |           |           |           |             |                                                |       |        |      |       |        |        |       |        |       |                     |                     |                           |                           |                       |                       |
|         | 6/18/19  | rotations+off | 15     | 20        |        |           |           |           |             |                                                |       |        |      |       |        |        |       |        |       |                     | ✓                   |                           |                           |                       |                       |
|         | 8/9/19   | rotations     | 9      | 18        |        |           |           |           |             |                                                |       |        |      |       |        |        |       |        |       |                     |                     |                           |                           |                       |                       |
|         | 8/12/19  | rotations     | 16     | 21        |        |           |           |           |             |                                                |       |        |      |       |        |        |       |        |       | ✓                   |                     |                           |                           |                       |                       |
|         | 10/27/19 | rotations     | 20     | 26        |        |           |           |           |             |                                                |       |        |      |       |        |        |       |        |       |                     | ✓                   |                           |                           |                       |                       |
|         | 10/28/19 | on/off        | 3      | 27        |        |           |           |           |             |                                                |       |        |      |       |        |        |       |        |       |                     |                     |                           |                           |                       |                       |
|         | 10/31/19 | rotations+off | 23     | 27        |        |           |           |           |             |                                                |       |        |      |       |        |        |       |        |       |                     |                     |                           |                           |                       |                       |
| mouse 2 |          |               |        |           |        |           |           |           |             | RSC                                            | RSC   | RSC    | RSC  | RSC   | N      | ADn    | ADn   | ADn    |       |                     |                     |                           |                           |                       |                       |
|         |          |               |        |           |        |           |           |           |             | 16                                             | 15    | 14     | 13   | 1,2   | 10,9   | 8,7    | 5,6   | 3,4    |       |                     |                     |                           |                           |                       |                       |
|         | 10/05/19 | rotations+off | 4      | 8         | 1      | 11        | 0         | 0         | 88          |                                                |       |        |      | 0.125 | 0.125  |        | 0.125 |        |       | ✓                   | ✓                   | ✓                         | ✓                         | ✓                     |                       |
|         | 10/08/19 | rotations+off | 1      | 8         | 1      | 9         | 0         | 0         | 72          |                                                |       |        |      | 0.125 |        |        | 0.125 |        |       |                     |                     | ✓                         |                           |                       | ✓                     |
|         | 10/09/19 | rotations     | 1      | 6         | 0      | 7         | 0         | 0         | 42          |                                                |       |        |      |       |        |        | 0.125 |        |       | ✓                   |                     |                           |                           |                       |                       |
|         | 10/09/19 | rotations     | 0      | 5         | 0      | 7         | 0         | 0         | 35          | 0.125                                          | 0.125 |        |      | 0.125 | 0.125  |        | 0.125 |        |       |                     |                     |                           |                           |                       |                       |
|         | 10/10/19 | rotations     | 2      | 13        | 0      | 10        | 0         | 0         | 130         |                                                |       |        |      | 0.375 | 0.125  | 0.25   | 0.375 | 0.125  |       |                     | ✓                   | ✓                         | ✓                         |                       |                       |
|         | 10/14/19 | rotations+off | 6      | 13        | 0      | 11        | 0         | 0         | 143         |                                                |       | 0.25   | 0.25 | 0.125 |        |        |       |        |       | ✓                   |                     | ✓                         |                           | ✓                     |                       |
|         | 10/18/19 | rotations     | 5      | 14        | 0      | 14        | 0         | 0         | 210         |                                                |       | 0.5    | 0.5  |       |        |        |       | -0.125 |       |                     | ✓                   |                           | ✓                         |                       |                       |
|         | 10/21/19 | rotations+off | 4      | 14        | 0      | 12        | 0         | 0         | 140         |                                                |       |        |      | 0.4   | 0.4    | -0.1   |       |        |       |                     |                     | ✓                         |                           |                       |                       |
|         | 10/27/19 | rotations+off | 8      | 16        | 1      | 13        | 0         | 0         | 208         |                                                |       |        |      |       |        |        |       |        |       | ✓                   |                     | ✓                         | ✓                         | ✓                     |                       |
|         | 10/28/19 | on/off        | 8      | 19        | 2      | 11        | 0         | 0         | 209         | 0.3                                            | 0.3   |        |      |       |        |        |       |        |       |                     |                     |                           |                           |                       |                       |
|         | 10/31/19 | rotations     | 7      | 19        | 0      | 18        | 0         | 0         | 342         |                                                |       |        |      |       | 0.25   | 0.125  |       | -0.1   |       |                     | ✓                   |                           |                           |                       |                       |
|         | 12/03/19 | rotations+off | 12     | 19        | 0      | 14        | 0         | 0         | 266         |                                                |       |        |      |       | 0.25   | 0.125  |       | 0.125  |       |                     | ✓                   |                           |                           |                       | ✓                     |
|         | 01/07/20 | rotations     | 8      | 15        | 0      | 16        | 0         | 0         | 225         |                                                |       |        |      |       |        |        |       | 0.125  |       |                     | ✓                   |                           | ✓                         |                       |                       |
| mouse 3 |          |               | N/A    | N/A       |        |           | N/A       | N/A       | N/A         |                                                |       |        |      |       |        |        |       |        |       |                     |                     |                           |                           |                       |                       |
|         | 02/22/20 | rotations     |        |           | 6      | 92        |           |           |             |                                                |       |        |      |       |        |        |       |        |       |                     |                     |                           | ✓                         |                       |                       |
|         | 02/23/20 | rotations     |        |           | 14     | 94        |           |           |             |                                                |       |        |      |       |        |        |       |        |       |                     |                     |                           |                           |                       |                       |
|         | 02/24/20 | rotations     |        |           | 2      | 92        |           |           |             |                                                |       |        |      |       |        |        |       |        |       |                     |                     |                           |                           |                       |                       |
|         | 02/29/20 | rotations     |        |           | 4      | 104       |           |           |             |                                                |       |        |      |       |        |        |       |        |       |                     |                     |                           | ✓                         |                       |                       |
|         | 03/17/20 | rotations     |        |           | 13     | 104       |           |           |             |                                                |       |        |      |       |        |        |       |        |       |                     |                     |                           |                           |                       |                       |
|         | 03/19/20 | rotations     |        |           | 7      | 101       |           |           |             |                                                |       |        |      |       |        |        |       |        |       |                     |                     |                           |                           |                       |                       |
|         | 03/20/20 | rotations     |        |           | 4      | 100       |           |           |             |                                                |       |        |      |       |        |        |       |        |       |                     |                     |                           |                           |                       |                       |
|         | 03/21/20 | rotations     |        |           | 6      | 104       |           |           |             |                                                |       |        |      |       |        |        |       |        |       |                     |                     |                           |                           |                       |                       |
|         | 03/24/20 | rotations     |        |           | 24     | 96        |           |           |             |                                                |       |        |      |       |        |        |       |        |       |                     |                     |                           |                           |                       |                       |
|         | 03/25/20 | rotations     |        |           | 17     | 104       |           |           |             |                                                |       |        |      |       |        |        |       |        |       |                     | ✓                   |                           |                           |                       |                       |
|         | 03/26/20 | rotations     |        |           | 24     | 107       |           |           |             |                                                |       |        |      |       |        |        |       |        |       |                     |                     |                           |                           |                       |                       |
|         | 03/27/20 | rotations     |        |           | 16     | 105       |           |           |             |                                                |       |        |      |       |        |        |       |        |       |                     |                     |                           |                           |                       |                       |
|         | 03/29/20 | rotations     |        |           | 14     | 97        |           |           |             |                                                |       |        |      |       |        |        |       |        |       |                     |                     |                           | ✓                         |                       |                       |
|         | 03/31/20 | rotations     |        |           | 15     | 98        |           |           |             |                                                |       |        |      |       |        |        |       |        |       |                     |                     |                           |                           |                       |                       |
| mouse 4 |          |               |        |           |        |           |           |           |             | RSC                                            | RSC   | RSC    | RSC  | RSC   | ADn    | N      | N     | N      | N     | ADn                 |                     |                           |                           |                       |                       |
|         |          |               |        |           |        |           |           |           |             | 9                                              | 10    | 11     | 12   | 13    | 14, 15 | 16,1   | 2,3   | 4,5    | 6,7   | 8                   |                     |                           |                           |                       |                       |
|         | 02/28/20 | rotations     | 2      | 6         | 1      | 33        | 0         | 0         | 198         |                                                |       |        |      |       |        |        | 0.125 |        | 0.125 | 0.125               | ✓                   | ✓                         | ✓                         | ✓                     |                       |
|         | 03/02/20 | rotations     | 2      | 8         | 3      | 31        | 0         | 0         | 248         |                                                |       |        |      |       |        |        |       |        |       | 0.125               |                     |                           |                           |                       |                       |
|         | 03/07/20 | rotations     | 1      | 7         | 6      | 42        | 0         | 0         | 287         |                                                |       |        |      |       | 0.125  | 0.25   | 0.125 | 1      | 0.25  | 0.25                |                     | ✓                         |                           | ✓                     |                       |
|         | 03/12/20 | rotations     | 1      | 4         | 9      | 39        | 0         | 0         | 156         |                                                |       |        |      |       | 0.125  | 0.125  | 0.125 | 0.125  | 0.125 | 0.125               |                     |                           | ✓                         |                       |                       |
|         | 03/13/20 | rotations     | 4      | 6         | 6      | 35        | 0         | 0         | 210         |                                                |       |        |      |       | 0.125  | 0.25   |       | 0.25   | 0.25  | 0.25                | ✓                   |                           | ✓                         |                       |                       |
|         | 03/16/20 | rotations     | 1      | 6         | 11     | 39        | 0         | 0         | 195         |                                                |       |        |      |       | 0.1    |        |       | -0.1   |       | -0.75               |                     |                           |                           |                       |                       |
|         | 03/19/20 | rotations     | 1      | 4         | 3      | 31        | 0         | 0         | 124         |                                                |       |        |      |       | -0.125 | -0.125 |       | -0.125 | 0.75  |                     | ✓                   |                           | ✓                         | ✓                     |                       |
|         | 03/20/20 | rotations     | 1      | 7         | 4      | 34        | 0         | 0         | 238         |                                                |       |        |      |       | -0.025 | -0.125 |       | -0.025 | -0.25 | -0.025              | ✓                   |                           |                           |                       |                       |
|         | 03/23/20 | rotations     | 0      | 5         | 5      | 34        | 0         | 0         | 170         |                                                |       |        |      |       | -0.25  |        |       | 0.125  |       | 0.5                 |                     |                           | ✓                         |                       |                       |
|         | 03/25/20 | rotations     | 2      | 12        | 9      | 31        | 0         | 0         | 372         |                                                |       |        |      |       | 0.1    |        |       |        |       |                     |                     |                           | ✓                         |                       |                       |
|         | 03/26/20 | rotations     | 3      | 11        | 1      | 29        | 0         | 0         | 319         |                                                |       |        |      |       | 0.725  | 0.125  | 0.125 | 1.25   | 0.125 |                     | ✓                   |                           |                           |                       |                       |
|         | 03/31/20 | rotations     | 3      | 11        | 2      | 33        | 0         | 0         | 363         |                                                |       |        |      |       |        |        |       | -0.75  |       |                     |                     |                           |                           |                       |                       |
|         | 04/04/20 | rotations     | 2      | 10        | 2      | 28        | 0         | 0         | 280         |                                                |       |        |      |       |        |        |       | -0.25  | 0.125 |                     |                     |                           |                           |                       |                       |
|         | 04/05/20 | rotations     | 5      | 11        | 3      | 30        | 0         | 0         | 300         |                                                |       |        |      |       | 0.25   |        |       | -0.5   |       |                     |                     |                           |                           |                       |                       |
| mouse 5 |          |               |        |           |        |           |           |           |             | RSC                                            | RSC   | RSC    | RSC  | RSC   | N      | N      | ADn   | N      | N     |                     |                     |                           |                           |                       |                       |
|         |          |               |        |           |        |           |           |           |             | 15, 16                                         | 14    | 13, 12 | 2    | 1     | 11     | 10,9   | 5,6   | 4      | 3     |                     |                     |                           |                           |                       |                       |
|         | 03/23/20 | rotations     | 2      | 3         | 5      | 26        | 10        | 0         | 78          |                                                |       |        |      |       |        |        |       |        |       |                     | ✓                   | ✓                         | ✓                         | ✓                     |                       |
|         | 03/24/20 | rotations     | 3      | 4         | 4      | 25        | 14        | 0         | 100         |                                                |       |        |      |       |        |        | 0.125 |        |       |                     |                     |                           |                           |                       |                       |
|         | 03/28/20 | rotations     | 3      | 3         | 3      | 27        | 10        | 0         | 81          |                                                | 0.125 | 2      |      |       | 0.125  | 0.125  | 0.125 |        | 1     |                     |                     |                           |                           |                       |                       |

|          |          |               |     |     |   |    |     |     |     |       |       |       |       |       |         |       |       |       |       |   |   |   |   |   |   |   |  |
|----------|----------|---------------|-----|-----|---|----|-----|-----|-----|-------|-------|-------|-------|-------|---------|-------|-------|-------|-------|---|---|---|---|---|---|---|--|
|          | 03/31/20 | rotations     | 3   | 3   | 3 | 27 | 11  | 0   | 81  |       |       |       |       |       |         |       |       |       |       |   |   | ✓ |   | ✓ |   |   |  |
|          | 04/20/20 | rotations     | 2   | 5   | 4 | 31 | 17  | 0   | 140 |       |       |       |       |       |         |       |       |       |       |   |   | ✓ | ✓ | ✓ | ✓ |   |  |
|          | 04/21/21 | rotations     | 1   | 5   | 2 | 24 | 12  | 0   | 115 |       | 0.25  | 0.25  |       |       | 0.4     | 0.4   | 0.25  |       | 0.25  |   |   |   |   | ✓ |   |   |  |
|          | 04/24/20 | rotations     | 1   | 3   | 2 | 30 | 9   | 0   | 87  |       | 0.375 | 0.375 |       |       | 0.375   | 0.375 | 0.125 |       | 0.375 |   | ✓ | ✓ | ✓ | ✓ |   |   |  |
|          | 04/28/20 | rotations     | 3   | 3   | 3 | 23 | 10  | 0   | 69  |       | 0.125 | 0.125 |       |       | 0.125   | 0.125 | 0.125 |       | 0.125 |   |   |   |   | ✓ |   |   |  |
|          | 05/01/20 | rotations     | 2   | 3   | 0 | 22 | 12  | 0   | 66  |       |       |       |       |       |         |       |       |       |       |   |   |   |   |   |   |   |  |
| mouse 6  |          |               |     |     |   |    |     |     |     | RSC   | RSC   | RSC   |       |       | ADn     | N     |       |       |       |   |   |   |   |   |   |   |  |
|          |          |               |     |     |   |    |     |     |     | 7     | 2     | 1     |       |       | 9,8     | 11,10 |       |       |       |   |   |   |   |   |   |   |  |
|          | 03/23/20 | rotations     | 4   | 4   | 0 | 1  | 0   | 0   | 4   |       |       |       |       |       |         |       |       |       |       |   |   | ✓ |   | ✓ |   |   |  |
|          | 03/24/20 | rotations     | 4   | 4   | 1 | 4  | 0   | 0   | 16  |       |       |       |       |       |         |       |       |       |       |   |   |   | ✓ |   |   |   |  |
|          | 03/26/20 | rotations     | 2   | 2   | 0 | 0  | 0   | 0   | 0   | 0.25  | 0.24  | 0.25  |       |       |         | 0.25  |       |       |       |   |   |   |   |   |   |   |  |
|          | 03/27/20 | rotations     | 2   | 3   | 0 | 0  | 0   | 0   | 0   |       |       |       |       |       | 0.125   |       |       |       |       |   |   | ✓ |   | ✓ |   |   |  |
|          | 03/31/20 | rotations     | 4   | 5   | 0 | 0  | 0   | 0   | 0   |       |       |       |       |       |         | 0.25  |       |       |       |   |   |   |   | ✓ |   |   |  |
|          | 04/10/20 | rotations     | 4   | 6   | 0 | 0  | 0   | 0   | 0   |       |       |       |       |       |         |       |       |       |       |   |   |   |   |   |   |   |  |
|          | 04/11/20 | rotations     | 3   | 5   | 0 | 0  | 0   | 0   | 0   |       |       |       |       |       |         | 0.25  |       |       |       |   |   |   |   |   |   |   |  |
|          | 04/15/20 | rotations     | 5   | 9   | 0 | 0  | 0   | 0   | 0   |       |       |       |       |       |         |       |       |       |       |   | ✓ |   |   |   |   |   |  |
|          | 04/17/20 | rotations+off | 5   | 7   | 0 | 2  | 0   | 0   | 14  |       |       |       |       |       |         |       |       |       |       |   |   |   |   | ✓ |   | ✓ |  |
|          | 04/18/20 | rotations     | 4   | 8   | 0 | 2  | 0   | 0   | 14  |       |       |       |       |       |         |       |       |       |       |   |   |   |   |   |   |   |  |
|          | 04/19/20 | rotations+off | 5   | 7   | 0 | 1  | 0   | 0   | 7   |       |       | 0.25  |       |       | 0.125   | -0.25 |       |       |       |   |   |   |   |   |   |   |  |
|          | 04/20/20 | rotations     | 4   | 5   | 0 | 2  | 0   | 0   | 10  |       |       |       |       |       |         |       |       |       |       |   | ✓ |   | ✓ |   |   |   |  |
|          | 04/20/20 | rotations+off | 3   | 4   | 0 | 2  | 0   | 0   | 8   |       |       |       |       |       |         |       |       |       |       |   |   |   |   |   |   |   |  |
|          | 04/21/20 | rotations     | 5   | 7   | 0 | 3  | 0   | 0   | 21  |       |       |       |       |       |         |       |       |       |       |   |   |   |   |   |   |   |  |
| mouse 7  |          |               |     |     |   |    |     |     |     | RSC   | RSC   | RSC   | RSC   | N     | ADn     | ADn   | N     |       |       |   |   |   |   |   |   |   |  |
|          |          |               |     |     |   |    |     |     |     | 6,7   | 9,8   | 10,11 | 12,13 | 14,15 | 16,1    | 2,3   | 4,5   |       |       |   |   |   |   |   |   |   |  |
|          | 07/02/20 | rotations     | 4   | 8   | 1 | 38 | 14  | 0   | 296 | 0.25  |       |       |       |       | 0.375   |       | 0.375 |       |       |   | ✓ | ✓ | ✓ | ✓ |   |   |  |
|          | 07/07/20 | rotations     | 5   | 5   | 6 | 34 | 20  | 1   | 170 |       |       |       |       |       |         |       |       |       |       |   | ✓ | ✓ | ✓ | ✓ |   |   |  |
|          | 07/09/20 | rotations     | 4   | 5   | 0 | 29 | 16  | 0   | 145 |       |       |       |       |       |         |       |       |       |       |   |   |   |   |   |   |   |  |
| mouse 8  |          |               |     |     |   |    |     |     |     | RSC   | RSC   | RSC   | RSC   | N     | ADn     | N     | N     |       |       |   |   |   |   |   |   |   |  |
|          |          |               |     |     |   |    |     |     |     | 12,13 | 14,15 | 16,1  | 2,3   | 4,5   | 6,7     | 8,9   | 10,11 |       |       |   |   |   |   |   |   |   |  |
|          | 07/22/20 | rotations     | 4   | 9   | 1 | 19 | 37  | 0   | 171 |       |       |       |       |       |         |       |       |       |       |   | ✓ | ✓ | ✓ | ✓ |   |   |  |
|          | 07/24/20 | rotations     | 3   | 10  | 0 | 13 | 21  | 0   | 130 |       |       |       |       |       |         |       |       |       |       |   |   |   |   |   |   |   |  |
| mouse 9  |          |               |     |     |   |    |     |     |     | RSC   | RSC   | RSC   | RSC   | RSC   | N       | N     | ADn   | N     | ADn   |   |   |   |   |   |   |   |  |
|          |          |               |     |     |   |    |     |     |     | 6     | 7,8   | 9     | 10,11 | 12,13 | 14      | 15    | 16,1  | 2,3   | 4,5   |   |   |   |   |   |   |   |  |
|          | 01/26/21 | on/off        | 3   | 4   | 3 | 20 | 19  | 0   | 80  | -0.25 |       |       |       |       | 0.5     |       | -0.75 |       | 0.125 |   | ✓ | ✓ |   |   | ✓ | ✓ |  |
|          | 02/04/21 | on/off        | 1   | 3   | 4 | 12 | 6   | 0   | 36  | 0.125 |       |       |       |       | 0.125   |       | 0.125 |       |       |   | ✓ |   |   |   | ✓ | ✓ |  |
|          | 02/06/21 | on/off        | 2   | 4   | 2 | 17 | 11  | 0   | 68  | 0.25  |       |       |       |       |         |       | -1    | -0.25 |       |   |   |   |   |   |   |   |  |
|          | 02/11/21 | on/off        | 2   | 3   | 3 | 21 | 11  | 0   | 63  |       |       |       |       |       |         |       |       |       |       |   |   |   |   | ✓ |   |   |  |
|          | 02/12/21 | rotations     | 2   | 4   | 2 | 19 | 22  | 0   | 76  |       |       |       |       |       |         |       |       |       |       |   |   |   | ✓ | ✓ |   |   |  |
|          | 02/12/21 | rotations     | 2   | 4   | 5 | 20 | 32  | 0   | 80  |       |       |       |       |       | 0.25    |       | 0.125 |       |       |   |   |   |   |   |   |   |  |
|          | 02/19/21 | on/off        | 2   | 4   | 1 | 19 | 13  | 2   | 76  | 0.25  | 0.25  |       | 0.125 |       | 0.125   |       | 0.25  | 0.25  |       |   |   | ✓ |   |   |   |   |  |
|          | 03/07/21 | rotations     | 2   | 4   | 0 | 14 | 15  | 0   | 56  |       | 0.25  | 1     | 0.125 | 0.125 |         |       | 0.125 | 0.125 | 0.125 |   | ✓ | ✓ |   | ✓ |   |   |  |
|          | 03/12/21 | on/off        | 4   | 5   | 5 | 13 | 24  | 0   | 65  |       |       |       |       |       |         |       |       |       |       |   |   |   |   | ✓ | ✓ |   |  |
|          | 03/15/21 | rotations     | 3   | 5   | 3 | 15 | 23  | 0   | 75  |       |       |       |       |       |         |       |       |       |       |   |   |   | ✓ | ✓ |   |   |  |
|          | 03/17/21 | rotations     | 2   | 4   | 4 | 15 | 20  | 0   | 60  | -1    | -1    | 1     | 0.25  | 0.125 |         |       | 0.125 | 0.125 | 0.25  |   |   |   |   |   |   |   |  |
|          | 03/20/21 | rotations     | 3   | 9   | 4 | 17 | 19  | 1   | 153 | 2     | 1.5   | 0.5   | 0.125 | 0.125 |         |       |       | -0.5  | 0.25  |   | ✓ |   | ✓ | ✓ |   |   |  |
|          | 03/23/21 | on/off        | 4   | 10  | 5 | 13 | 14  | 0   | 130 |       |       |       |       |       |         |       |       |       |       |   |   |   |   |   | ✓ | ✓ |  |
|          | 06/24/21 | on/off        | 3   | 4   | 5 | 20 | 25  | 0   | 80  |       |       |       |       |       |         |       |       |       |       |   |   | ✓ |   |   | ✓ | ✓ |  |
|          | 06/25/21 | on/off        | 2   | 4   | 2 | 16 | 19  | 0   | 64  |       |       |       |       |       |         |       |       |       |       |   |   |   |   |   |   |   |  |
|          | 06/26/21 | on/off        | 2   | 3   | 2 | 15 | 14  | 0   | 45  | 0.25  |       | 0.25  |       |       |         |       |       |       |       |   |   |   |   |   | ✓ |   |  |
|          | 06/27/21 | on/off        | 2   | 3   | 2 | 14 | 13  | 0   | 42  |       |       |       |       |       |         |       |       |       |       |   |   |   |   |   |   |   |  |
| mouse 10 |          |               |     |     |   |    |     |     |     | RSC   | RSC   | RSC   | RSC   | RSC   | N       | N     | N     | N     | N     |   |   |   |   |   |   |   |  |
|          |          |               | N/A | N/A |   |    | N/A | N/A | N/A | 9     | 8     | 7     | 6,5   | 4     | 2,3     | 1,16  | 14,15 | 12,13 | 11,10 |   |   |   |   |   |   |   |  |
|          | 03/18/20 | rotations     |     |     | 0 | 18 |     |     |     |       |       |       |       |       |         |       | 0.25  | 0.25  | 0.25  |   |   |   | ✓ |   | ✓ |   |  |
|          | 03/20/23 | rotations     |     |     | 4 | 22 |     |     |     |       |       |       |       |       |         |       |       |       |       |   |   |   |   |   |   |   |  |
|          | 03/23/20 | rotations     |     |     | 2 | 18 |     |     |     |       |       |       |       |       |         |       |       |       |       |   |   |   |   |   |   |   |  |
|          | 03/24/20 | rotations     |     |     | 1 | 13 |     |     |     |       |       |       |       |       |         |       |       |       |       |   |   |   |   | ✓ |   |   |  |
|          | 03/26/20 | rotations     |     |     | 0 | 24 |     |     |     |       |       |       |       |       | 0.125   | 0.125 | 0.125 | 0.125 | 0.125 |   |   | ✓ |   | ✓ |   |   |  |
|          | 04/20/20 | rotations     |     |     | 1 | 17 |     |     |     |       |       |       |       |       |         |       |       |       |       |   |   |   |   | ✓ |   |   |  |
| mouse 11 |          |               |     |     |   |    |     |     |     | RSC   | RSC   | RSC   | RSC   | RSC   | N       | N     | N     | ADn   | ADn   |   |   |   |   |   |   |   |  |
|          |          |               |     |     |   |    |     |     |     | 11    | 10,9  | 8     | 6,7   | 5     | 2,3     | 1,16  | 15,14 | 13    | 12    |   |   |   |   |   |   |   |  |
|          | 03/02/20 | rotations     | 2   | 6   | 7 | 30 | 18  | 0   | 180 | 0.25  | 0.25  |       | 0.125 |       | -0.25   | 0.125 | 1.825 | 1     |       |   | ✓ | ✓ | ✓ | ✓ |   |   |  |
|          | 03/27/20 | rotations     | 0   | 5   | 2 | 33 | 13  | 0   | 160 |       |       |       |       |       |         |       |       |       |       |   | ✓ | ✓ | ✓ | ✓ |   |   |  |
| mouse 12 |          |               |     |     |   |    |     |     |     | RSC   | RSC   | RSC   | RSC   | RSC   | ADn /AV | ADn   | N     | N     |       |   |   |   |   |   |   |   |  |
|          |          |               |     |     |   |    |     |     |     | 6,7   | 8     | 9,10  | 12,11 | 13    | 16,15   | 1,2   | 3,4   | 5     |       |   |   |   |   |   |   |   |  |
|          | 01/15/21 | rotations     | 3   | 5   | 1 | 8  | 13  | 0   | 40  | 0.375 |       | 0.25  | 0.375 | 0.5   | 0.5     | 0.625 | 0.625 | 0.125 |       |   | ✓ | ✓ | ✓ | ✓ |   |   |  |
|          | 01/19/21 | rotations     | 5   | 8   | 1 | 6  | 14  | 0   | 42  | 0.2   |       | 0.2   | 0.2   |       |         |       | 0.125 | 0.125 |       |   | ✓ |   | ✓ | ✓ |   |   |  |
|          | 01/21/21 | on/off        | 3   | 6   | 3 | 6  | 16  | 0   | 36  | 1.975 |       | 0.875 | 0.625 |       | 0.325   | 0.5   | 1.375 | 0.625 |       |   |   |   |   | ✓ | ✓ |   |  |
|          | 02/04/21 | on/off        | 4   | 7   | 1 | 8  | 14  | 0   | 56  | 3     |       |       |       |       | 0.125   | 0.125 | 0.125 |       |       | ✓ |   |   |   | ✓ | ✓ |   |  |

[illegible]
